# Supplementary material for: Identification of a 20-Gene Expression-Based Risk Score as a Predictor of Clinical Outcome in Chronic Lymphocytic Leukemia Patients
Source: Hindawi journal article supplement (doi:10.1155/2014/423174), 2014-01-01
Supplement: f1 [file 423174.f1.pdf]

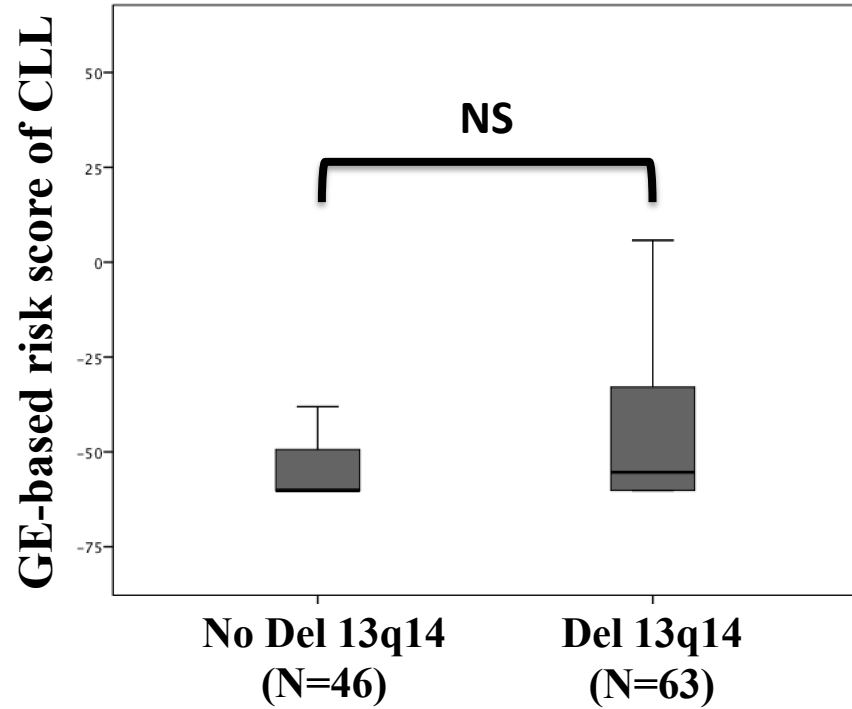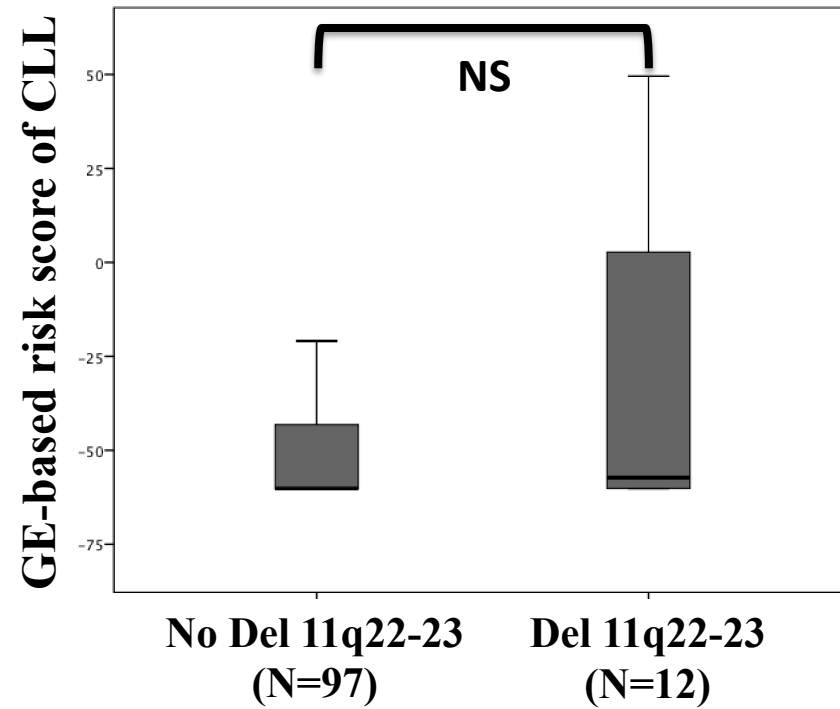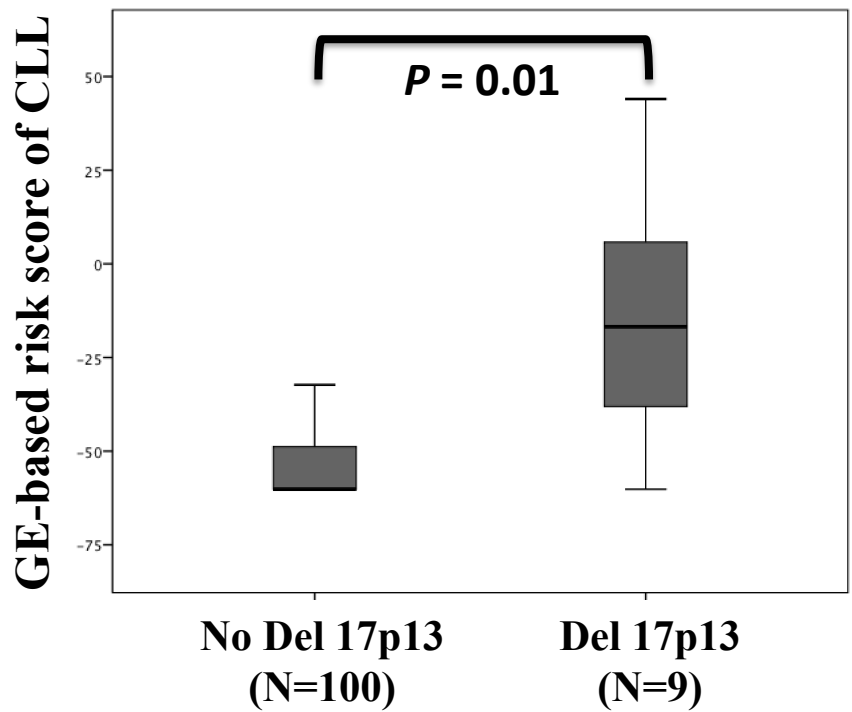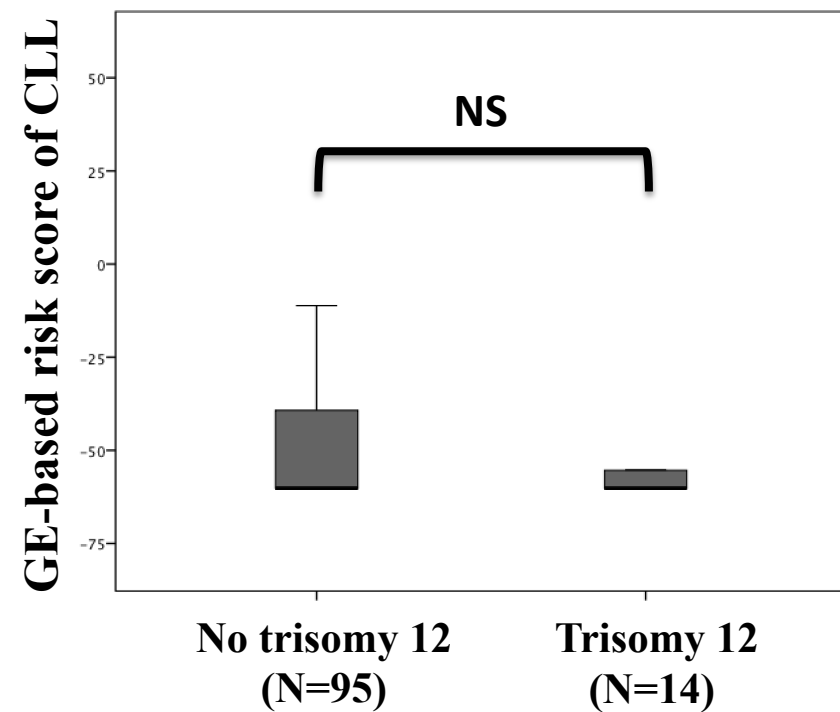

**Supplementary Figure S1. GEP-based risk score.**

Association between the GE-based risk score and chromosomal abnormalities in CLL patients.

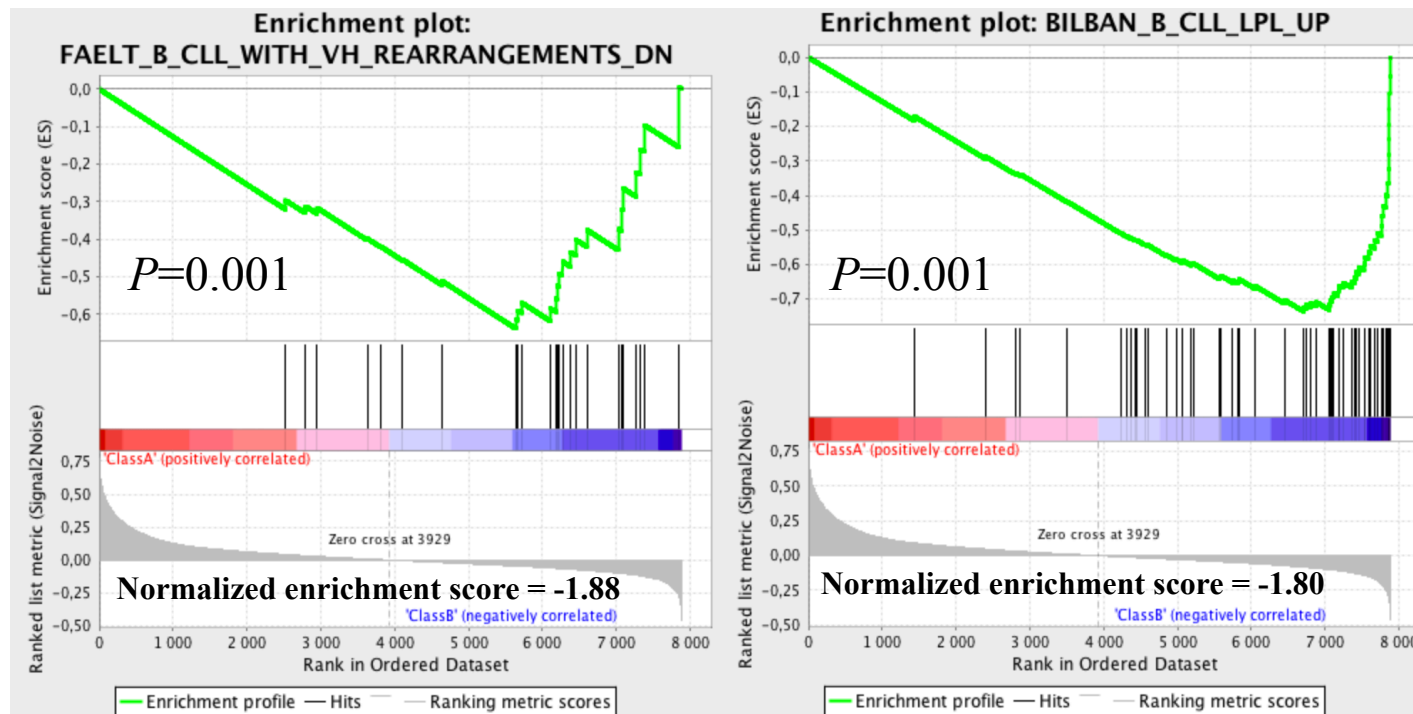

**Supplementary Figure S2. Top gene sets significantly associated with high GEP-based risk score.**

GSEA enrichment plots with the absolute enrichment p value and the normalized enrichment score of the gene set.

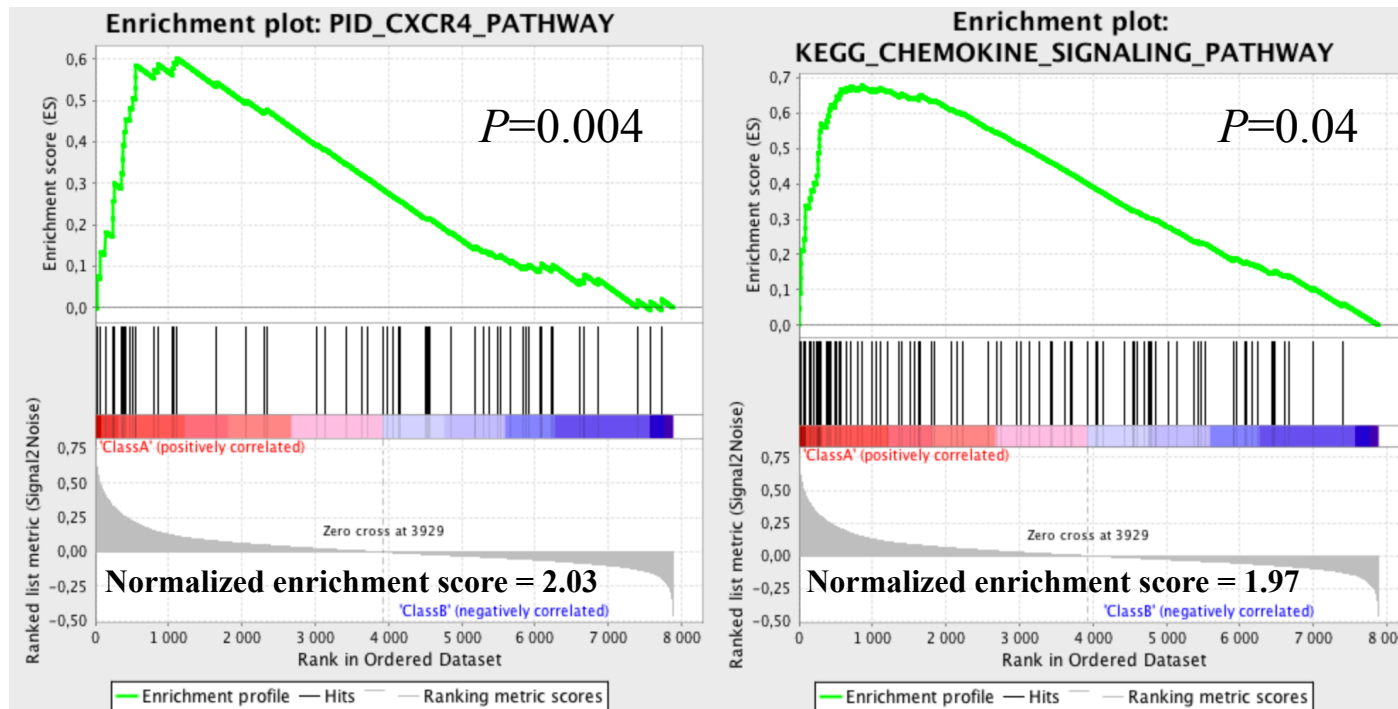

**Supplementary Figure S3. Top gene set significantly associated with low GEP-based risk score.**

GSEA enrichment plot with the absolute enrichment p value and the normalized enrichment score of the gene set.

**Supplementary TABLE S1: Genes set enrichment analysis revealed a significant overrepresentation of the gene set FAELT\_B\_CLL\_WITH\_VH\_REARRANGEMENTS\_DN in high risk CLL patients compared to low risk patients ( $P=0.001$ ).**

| PROBE   | GENE SYMBOL | GENE_TITLE                                                 | RANK METRIC SCORE     | RUNNING Enrichment Score | CORE ENRICHMENT |
|---------|-------------|------------------------------------------------------------|-----------------------|--------------------------|-----------------|
| XBP1    | XBP1        | X-box binding protein 1                                    | -0.04499693214893341  | -0.6130199               | Yes             |
| VPS13B  | VPS13B      | vacuolar protein sorting 13B (yeast)                       | -0.045701898634433746 | -0.5900873               | Yes             |
| ZHX2    | ZHX2        | zinc fingers and homeoboxes 2                              | -0.047306593507528305 | -0.5700497               | Yes             |
| PARP4   | PARP4       | poly (ADP-ribose) polymerase family, member 4              | -0.05936216562986374  | -0.5849426               | Yes             |
| UBE2D2  | UBE2D2      | ubiquitin-conjugating enzyme E2D 2 (UBC4/5 homolog, yeast) | -0.06224088743329048  | -0.5583657               | Yes             |
| CBX7    | CBX7        | chromobox homolog 7                                        | -0.062492795288562775 | -0.5240116               | Yes             |
| HSPA4   | HSPA4       | heat shock 70kDa protein 4                                 | -0.06306540966033936  | -0.49072808              | Yes             |
| PBX3    | PBX3        | pre-B-cell leukemia transcription factor 3                 | -0.06499937176704407  | -0.45976883              | Yes             |
| ASMTL   | ASMTL       | acetylserotonin O-methyltransferase-like                   | -0.06841114908456802  | -0.43384722              | Yes             |
| TMEM147 | TMEM147     | transmembrane protein 147                                  | -0.07219166308641434  | -0.4018115               | Yes             |
| PFN2    | PFN2        | profilin 2                                                 | -0.07871776074171066  | -0.37531516              | Yes             |
| MRPL40  | MRPL40      | mitochondrial ribosomal protein L40                        | -0.09883939474821091  | -0.3726303               | Yes             |
| PFKP    | PFKP        | phosphofructokinase, platelet                              | -0.10060647130012512  | -0.3199549               | Yes             |
| GLO1    | GLO1        | glyoxalase I                                               | -0.10182798653841019  | -0.26479724              | Yes             |
| MAGED2  | MAGED2      | melanoma antigen family D, 2                               | -0.1134805828332901   | -0.22126743              | Yes             |
| SLC35D2 | SLC35D2     | solute carrier family 35, member D2                        | -0.11825907230377197  | -0.16011041              | Yes             |
| MYLK    | MYLK        | myosin, light chain kinase                                 | -0.1252080351114273   | -0.09559967              | Yes             |
| LDOC1   | LDOC1       | leucine zipper, down-regulated in cancer 1                 | -0.2783927023410797   | 0.004070683              | Yes             |

**Supplementary TABLE S2: Genes set enrichment analysis revealed a significant overrepresentation of the gene set BILBAN\_B\_CLL\_LPL\_UP in high risk CLL patients compared to low risk patients ( $P=0.001$ ).**

| PROBE      | GENE SYMBOL | GENE_TITLE                                                   | RANK METRIC SCORE    | RUNNING Enrichment Score | CORE ENRICHMENT |
|------------|-------------|--------------------------------------------------------------|----------------------|--------------------------|-----------------|
| TBC1D1     | TBC1D1      | TBC1 (tre-2/USP6, BUB2, cdc16) domain family, member 1       | -0.08338106423616409 | -0.7253143               | Yes             |
| CPT1A      | CPT1A       | carnitine palmitoyltransferase 1A (liver)                    | -0.08443442732095718 | -0.7172482               | Yes             |
| SLC39A14   | SLC39A14    | solute carrier family 39 (zinc transporter), member 14       | -0.0874563530087471  | -0.71323246              | Yes             |
| IRF4       | IRF4        | interferon regulatory factor 4                               | -0.09082043170928955 | -0.7096421               | Yes             |
| PNMA2      | PNMA2       | paraneoplastic antigen MA2                                   | -0.09997770935297012 | -0.7176791               | Yes             |
| CEACAM1    | CEACAM1     | carcinoembryonic antigen-related cell adhesion molecule 1    | -0.10055960714817047 | -0.7050652               | Yes             |
| MYBL2      | MYBL2       | v-myb myeloblastosis viral oncogene homolog (avian)-like 2   | -0.1016419380903244  | -0.69408906              | Yes             |
| AZIN1      | AZIN1       | antizyme inhibitor 1                                         | -0.10350252687931061 | -0.68323684              | Yes             |
| TMEM140    | TMEM140     | transmembrane protein 140                                    | -0.10717408359050751 | -0.6757056               | Yes             |
| DNMBP      | DNMBP       | dynamin binding protein                                      | -0.10790828615427017 | -0.6621949               | Yes             |
| SLC23A2    | SLC23A2     | solute carrier family 23 (nucleobase transporters), member 2 | -0.11094300448894501 | -0.65298843              | Yes             |
| RRBP1      | RRBP1       | ribosome binding protein 1 homolog 180kDa (dog)              | -0.12251496315002441 | -0.65060097              | Yes             |
| ST6GALNAC4 | ST6GALNAC4  | ST6-N-acetylgalactosaminide alpha-2,6-sialyltransferase 4    | -0.12699449062347412 | -0.637879                | Yes             |
| DIP2C      | DIP2C       | DIP2 disco-interacting protein 2 homolog C (Drosophila)      | -0.12917253375053406 | -0.6225537               | Yes             |
| WSB2       | WSB2        | WD repeat and SOCS box-containing 2                          | -0.13311201333999634 | -0.6091067               | Yes             |
| IGSF3      | IGSF3       | immunoglobulin superfamily, member 3                         | -0.14086134731769562 | -0.59790117              | Yes             |
| IGHD       | IGHD        | immunoglobulin heavy constant delta                          | -0.14238741993904114 | -0.57945585              | Yes             |
| CREB3L2    | CREB3L2     | cAMP responsive element binding protein 3-like 2             | -0.1480318158864975  | -0.5645676               | Yes             |
| FCER2      | FCER2       | Fc fragment of IgE, low affinity II, receptor for (CD23)     | -0.1534823179244995  | -0.54674757              | Yes             |
| ATOX1      | ATOX1       | ATX1 antioxidant protein 1 homolog (yeast)                   | -0.168036550283432   | -0.52996475              | Yes             |
| AKAP12     | AKAP12      | A kinase (PRKA) anchor protein (gravin) 12                   | -0.1812814623117447  | -0.5100578               | Yes             |
| ABCA6      | ABCA6       | ATP-binding cassette, sub-family A (ABC1), member 6          | -0.20973779261112213 | -0.48695025              | Yes             |
| FRY        | FRY         | furry homolog (Drosophila)                                   | -0.21455228328704834 | -0.45806098              | Yes             |
| BCL7A      | BCL7A       | B-cell CLL/lymphoma 7A                                       | -0.22043849527835846 | -0.42898992              | Yes             |
| SGCE       | SGCE        | sarcoglycan, epsilon                                         | -0.24693357944488525 | -0.3992914               | Yes             |
| ARMCX2     | ARMCX2      | armadillo repeat containing, X-linked 2                      | -0.27560511231422424 | -0.36457357              | Yes             |
| ANKRD57    | ANKRD57     | ankyrin repeat domain 57                                     | -0.2953161895275116  | -0.32429698              | Yes             |
| KLK2       | KLK2        | kallikrein 2, prostatic                                      | -0.3105448782444     | -0.2816418               | Yes             |
| DFNA5      | DFNA5       | deafness, autosomal dominant 5                               | -0.3124789595603943  | -0.2383337               | Yes             |
| SEPT10     | SEPT10      | septin 10                                                    | -0.3144703805446625  | -0.1946202               | Yes             |
| PEG10      | PEG10       | paternally expressed 10                                      | -0.3283138573169708  | -0.14897676              | Yes             |
| PHF16      | PHF16       | PHD finger protein 16                                        | -0.33501136302948    | -0.10227182              | Yes             |
| DMD        | DMD         | dystrophin (muscular dystrophy, Duchenne and Becker types)   | -0.3533475995063782  | -0.053138327             | Yes             |
| LPL        | LPL         | lipoprotein lipase                                           | -0.389405220746994   | 6.3877E-4                | Yes             |

**Supplementary TABLE S3: Genes set enrichment analysis revealed a significant overrepresentation of the gene set PID\_CXCR4\_PATHWAY in low risk CLL patients compared to high risk patients ( $P=0.004$ ).**

| PROBE  | GENE SYMBOL | GENE_TITLE                                                                              | RANK METRIC SCORE   | RUNNING ES | CORE ENRICHMENT |
|--------|-------------|-----------------------------------------------------------------------------------------|---------------------|------------|-----------------|
| PAG1   | PAG1        | phosphoprotein associated with glycosphingolipid microdomains 1                         | 0.597561240196228   | 0.0776465  | Yes             |
| CD247  | CD247       | CD247 molecule                                                                          | 0.4821421802043915  | 0.13548093 | Yes             |
| CD3G   | CD3G        | CD3g molecule, gamma (CD3-TCR complex)                                                  | 0.41322290897369385 | 0.18331309 | Yes             |
| PIK3R5 | PIK3R5      | phosphoinositide-3-kinase, regulatory subunit 5, p101                                   | 0.33174756169319153 | 0.21498702 | Yes             |
| ITGA4  | ITGA4       | integrin, alpha 4 (antigen CD49D, alpha 4 subunit of VLA-4 receptor)                    | 0.3287671208381653  | 0.2582759  | Yes             |
| CD3D   | CD3D        | CD3d molecule, delta (CD3-TCR complex)                                                  | 0.32326313853263855 | 0.30018815 | Yes             |
| CD4    | CD4         | CD4 molecule                                                                            | 0.27912190556526184 | 0.325577   | Yes             |
| PLCB1  | PLCB1       | phospholipase C, beta 1 (phosphoinositide-specific)                                     | 0.2644299268722534  | 0.35768825 | Yes             |
| FYN    | FYN         | FYN oncogene related to SRC, FGR, YES                                                   | 0.2613527774810791  | 0.39207122 | Yes             |
| PIK3R1 | PIK3R1      | phosphoinositide-3-kinase, regulatory subunit 1 (p85 alpha)                             | 0.2568548321723938  | 0.42482895 | Yes             |
| CD3E   | CD3E        | CD3e molecule, epsilon (CD3-TCR complex)                                                | 0.24974220991134644 | 0.4557389  | Yes             |
| ITGA6  | ITGA6       | integrin, alpha 6                                                                       | 0.23540905117988586 | 0.4810216  | Yes             |
| HCK    | HCK         | hemopoietic cell kinase                                                                 | 0.22374702990055084 | 0.50665873 | Yes             |
| ITGA5  | ITGA5       | integrin, alpha 5 (fibronectin receptor, alpha polypeptide)                             | 0.21087005734443665 | 0.52967566 | Yes             |
| PTK2   | PTK2        | PTK2 protein tyrosine kinase 2                                                          | 0.2093726545572281  | 0.55696535 | Yes             |
| YES1   | YES1        | v-yes-1 Yamaguchi sarcoma viral oncogene homolog 1                                      | 0.2083330899477005  | 0.5844991  | Yes             |
| PXN    | PXN         | paxillin                                                                                | 0.15401707589626312 | 0.57305706 | Yes             |
| GNAI3  | GNAI3       | guanine nucleotide binding protein (G protein), alpha inhibiting activity polypeptide 3 | 0.1462269425392151  | 0.5872838  | Yes             |
| ARRB2  | ARRB2       | arrestin, beta 2                                                                        | 0.12091217190027237 | 0.57715714 | Yes             |
| MMP9   | MMP9        | matrix metalloproteinase 9 (gelatinase B, 92kDa gelatinase, 92kDa type IV collagenase)  | 0.11903076618909836 | 0.5915739  | Yes             |
| PIK3CB | PIK3CB      | phosphoinositide-3-kinase, catalytic, beta polypeptide                                  | 0.11373784393072128 | 0.602086   | Yes             |

**Supplementary TABLE S4: Genes set enrichment analysis revealed a significant overrepresentation of the gene set KEGG\_CHEMOKINE\_SIGNALING\_PATHWAY in low risk CLL patients compared to high risk patients ( $P=0.04$ ).**

| PROBE  | GENE SYMBOL | GENE_TITLE                                                                              | RANK METRIC SCORE   | RUNNING Enrichment Score | CORE ENRICHMENT |
|--------|-------------|-----------------------------------------------------------------------------------------|---------------------|--------------------------|-----------------|
| CXCL2  | CXCL2       | chemokine (C-X-C motif) ligand 2                                                        | 0.6935211420059204  | 0.04809883               | Yes             |
| TIAM1  | TIAM1       | T-cell lymphoma invasion and metastasis 1                                               | 0.6424120664596558  | 0.09198278               | Yes             |
| CCR1   | CCR1        | chemokine (C-C motif) receptor 1                                                        | 0.5966988801956177  | 0.13279931               | Yes             |
| CCL20  | CCL20       | chemokine (C-C motif) ligand 20                                                         | 0.592612087726593   | 0.17410034               | Yes             |
| CXCL3  | CXCL3       | chemokine (C-X-C motif) ligand 3                                                        | 0.5661141276359558  | 0.21200848               | Yes             |
| ITK    | ITK         | IL2-inducible T-cell kinase                                                             | 0.49852678179740906 | 0.24403626               | Yes             |
| XCL2   | XCL2        | chemokine (C motif) ligand 2                                                            | 0.46367451548576355 | 0.2732424                | Yes             |
| CXCL1  | CXCL1       | chemokine (C-X-C motif) ligand 1 (melanoma growth stimulating activity, alpha)          | 0.45889031887054443 | 0.30493826               | Yes             |
| IL8    | IL8         | interleukin 8                                                                           | 0.45861756801605225 | 0.3370001                | Yes             |
| GNG11  | GNG11       | guanine nucleotide binding protein (G protein), gamma 11                                | 0.4110870659351349  | 0.3599625                | Yes             |
| CCL2   | CCL2        | chemokine (C-C motif) ligand 2                                                          | 0.3784455358982086  | 0.38218337               | Yes             |
| CXCL5  | CXCL5       | chemokine (C-X-C motif) ligand 5                                                        | 0.36029547452926636 | 0.40416232               | Yes             |
| PIK3R5 | PIK3R5      | phosphoinositide-3-kinase, regulatory subunit 5, p101                                   | 0.33174756169319153 | 0.42260504               | Yes             |
| CCL5   | CCL5        | chemokine (C-C motif) ligand 5                                                          | 0.3235359787940979  | 0.44316947               | Yes             |
| CX3CR1 | CX3CR1      | chemokine (C-X3-C motif) receptor 1                                                     | 0.3233361840248108  | 0.46577385               | Yes             |
| PPBP   | PPBP        | pro-platelet basic protein (chemokine (C-X-C motif) ligand 7)                           | 0.3223371207714081  | 0.48805162               | Yes             |
| PF4    | PF4         | platelet factor 4 (chemokine (C-X-C motif) ligand 4)                                    | 0.30851754546165466 | 0.50666755               | Yes             |
| CCL4   | CCL4        | chemokine (C-C motif) ligand 4                                                          | 0.306867778301239   | 0.52786386               | Yes             |
| PRKACB | PRKACB      | protein kinase, cAMP-dependent, catalytic, beta                                         | 0.30548328161239624 | 0.54883504               | Yes             |
| CCL7   | CCL7        | chemokine (C-C motif) ligand 7                                                          | 0.30158886313438416 | 0.5692772                | Yes             |
| PLCB1  | PLCB1       | phospholipase C, beta 1 (phosphoinositide-specific)                                     | 0.2644299268722534  | 0.5772371                | Yes             |
| PIK3R1 | PIK3R1      | phosphoinositide-3-kinase, regulatory subunit 1 (p85 alpha)                             | 0.2568548321723938  | 0.5927548                | Yes             |
| PF4V1  | PF4V1       | platelet factor 4 variant 1                                                             | 0.25288277864456177 | 0.6090217                | Yes             |
| CXCL10 | CXCL10      | chemokine (C-X-C motif) ligand 10                                                       | 0.24867390096187592 | 0.6243526                | Yes             |
| CXCL16 | CXCL16      | chemokine (C-X-C motif) ligand 16                                                       | 0.22437630593776703 | 0.6307961                | Yes             |
| HCK    | HCK         | hemopoietic cell kinase                                                                 | 0.22374702990055084 | 0.6460531                | Yes             |
| PTK2   | PTK2        | PTK2 protein tyrosine kinase 2                                                          | 0.2093726545572281  | 0.6545285                | Yes             |
| ARRB1  | ARRB1       | arrestin, beta 1                                                                        | 0.20537954568862915 | 0.6661908                | Yes             |
| GNG8   | GNG8        | guanine nucleotide binding protein (G protein), gamma 8                                 | 0.18877199292182922 | 0.67117214               | Yes             |
| CCL28  | CCL28       | chemokine (C-C motif) ligand 28                                                         | 0.17370964586734772 | 0.6749721                | Yes             |
| PXN    | PXN         | paxillin                                                                                | 0.15401707589626312 | 0.67264575               | Yes             |
| GNAI3  | GNAI3       | guanine nucleotide binding protein (G protein), alpha inhibiting activity polypeptide 3 | 0.1462269425392151  | 0.6774769                | Yes             |
